# Supplementary material for: Synthesis of donor–acceptor copolymers based on anthracene derivatives for polymer solar cells
Source: Royal Society of Chemistry journal article supplement (doi:10.1039/c3py00430a), 2013-01-01
Supplement: c3py00430a.pdf [file c3py00430a.pdf]

# Synthesis of donor-acceptor copolymers based on anthracene derivatives for polymer solar cells

Chunchen Liu, Wanzhu Cai, Xing Guan, Chunhui Duan, Qifan Xue, Lei Ying, Fei Huang\*, Yong Cao

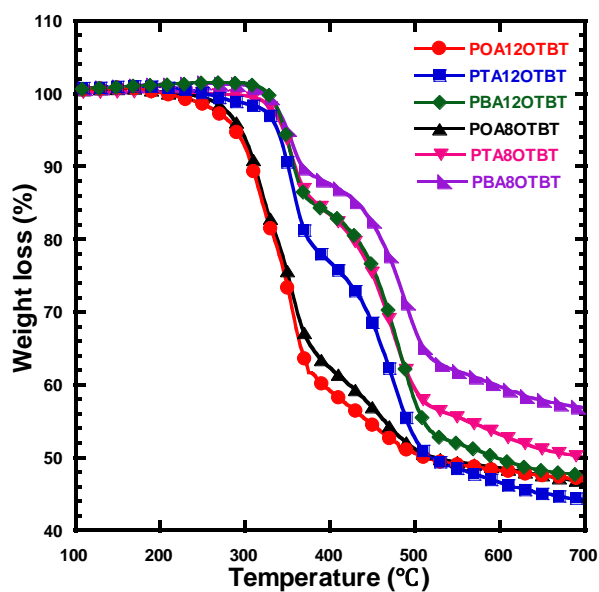

Figure S1. TG plots of POA12OTBT, PTA12OTBT, PBA12OTBT, POA8OTBT, PTA8OTBT, and PBA8OTBT

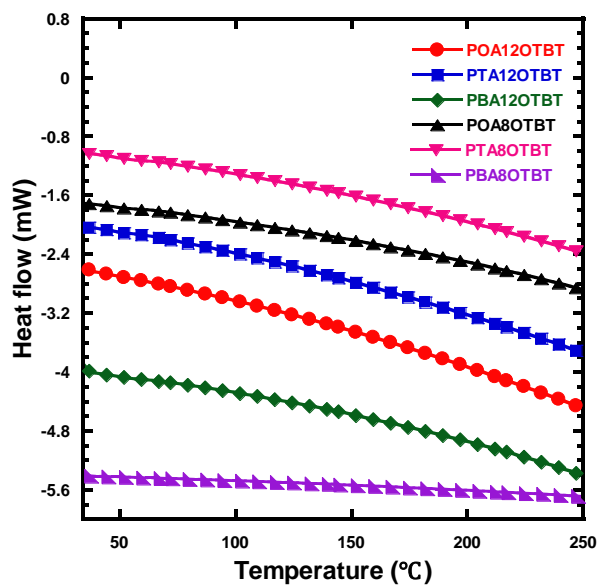

Figure S2. DSC plots of POA12OTBT, PTA12OTBT, PBA12OTBT, POA8OTBT, PTA8OTBT, and PBA8OTBT

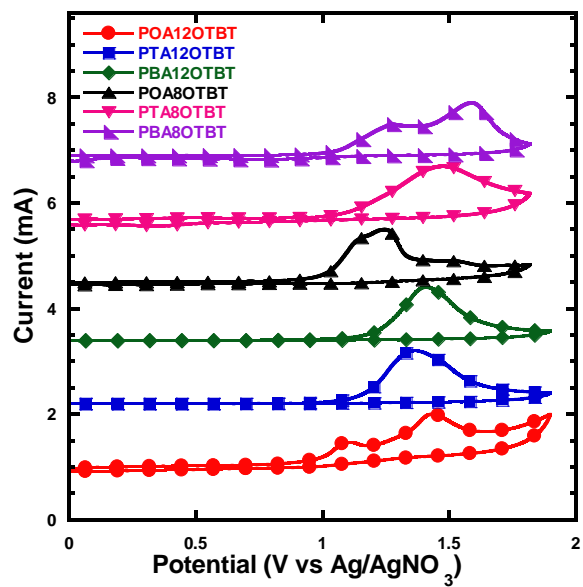

**Figure S3.** Cyclic voltammograms of the copolymers films measured in 0.1 M Bu<sub>4</sub>NPF<sub>6</sub> in acetonitrile at a scan rate of 50 mVs<sup>-1</sup>.
